# Supplementary material
Source: PubMed Central journal article supplement (PMC5553318)
Supplement: NIHMS884250-supplement-Supplement_1.pdf [file NIHMS884250-supplement-Supplement_1.pdf]

| Journal | Title                                                                                                                                    | Noncoding Annotation Tool | Reference                                               |
|---------|------------------------------------------------------------------------------------------------------------------------------------------|---------------------------|---------------------------------------------------------|
| N       | Common genetic variants influence human subcortical brain structures                                                                     | N                         | Hibar et al. <sup>1</sup>                               |
| N       | New genetic loci link adipose and insulin biology to body fat distribution                                                               | Y                         | Shungin et al. <sup>2</sup>                             |
| N       | Genetic studies of body mass index yield new insights for obesity biology                                                                | Y                         | Locke et al. <sup>3</sup>                               |
| N       | Sparsewhole-genome sequencing identifies two loci for major depressive disorder                                                          | N                         | Converge Consortium <sup>4</sup>                        |
| N       | Whole-genome sequencing identifies EN1 as a determinant of bone density and fracture                                                     | Y                         | Zheng et al. <sup>5</sup>                               |
| N       | A novel locus of resistance to severe malaria in a region of ancient balancing selection                                                 | N                         | Malaria Genomic Epidemiology Network <sup>6</sup>       |
| N       | Genetic predisposition to neuroblastoma mediated by a LMO1 super-enhancer polymorphism                                                   | N                         | Oldridge et al. <sup>7</sup>                            |
| N       | Sex-dependent dominance at a single locus maintains variation in age at maturity in salmon                                               | Y                         | Barson et al. <sup>8</sup>                              |
| NG      | Identification of six new susceptibility loci for invasive epithelial ovarian cancer                                                     | N                         | Kuchenbaecker et al. <sup>9</sup>                       |
| NG      | Discovery of six new susceptibility loci and analysis of pleiotropic effects in leprosy                                                  | N                         | Liu et al. <sup>10</sup>                                |
| NG      | Common variants in <i>ACYP2</i> influence susceptibility to cisplatin-induced hearing loss                                               | N                         | Xu et al. <sup>11</sup>                                 |
| NG      | A common variant mapping to <i>CACNA1A</i> is associated with susceptibility to exfoliation syndrome                                     | Y                         | Aung et al. <sup>12</sup>                               |
| NG      | Genome-wide association analysis of more than 120,000 individuals identifies 15 new susceptibility loci for breast cancer                | Y                         | Michailidou et al. <sup>13</sup>                        |
| NG      | Susceptibility to tuberculosis is associated with variants in the <i>ASAP1</i> gene encoding a regulator of dendritic cell migration     | N                         | Curtis et al. <sup>14</sup>                             |
| NG      | Common variants at 10p12.31, 10q21.1 and 13q12.13 are associated with sporadic pituitary adenoma                                         | N                         | Ye et al. <sup>15</sup>                                 |
| NG      | Genome-wide significant risk associations for mucinous ovarian carcinoma                                                                 | N                         | The Ovarian Cancer Association Consortium <sup>16</sup> |
| NG      | Loss-of-function variants in <i>ATM</i> confer risk of gastric cancer                                                                    | Y                         | Helgason et al. <sup>17</sup>                           |
| NG      | Common variation at 2p13.3, 3q29, 7p13 and 17q25.1 associated with susceptibility to pancreatic cancer                                   | Y                         | Childs et al. <sup>18</sup>                             |
| NG      | Association analyses identify 38 susceptibility loci for inflammatory bowel disease and highlight shared genetic risk across populations | N                         | Liu et al. <sup>19</sup>                                |

|      |                                                                                                                                                              |   |                                   |
|------|--------------------------------------------------------------------------------------------------------------------------------------------------------------|---|-----------------------------------|
| NG   | Chimeric EWSR1-FLI1 regulates the Ewing sarcoma susceptibility gene <i>EGR2</i> via a GGAA microsatellite                                                    | N | Grünewald et al. <sup>20</sup>    |
| NG   | Genome-wide meta-analysis identifies five new susceptibility loci for cutaneous malignant melanoma                                                           | Y | Law et al. <sup>21</sup>          |
| NG   | A coding variant in <i>RARG</i> confers susceptibility to anthracycline-induced cardiotoxicity in childhood cancer                                           | N | Aminkeng et al. <sup>22</sup>     |
| NG   | Height-reducing variants and selection for short stature in Sardinia                                                                                         | N | Zoledziewska et al. <sup>23</sup> |
| NG   | Genome sequencing elucidates Sardinian genetic architecture and augments association analyses for lipid and blood inflammatory markers                       | Y | Sidore et al. <sup>24</sup>       |
| NG   | Trans-ancestry genome-wide association study identifies                                                                                                      | Y | Kato et al. <sup>25</sup>         |
| NG   | Genetic association analyses implicate aberrant regulation of innate and adaptive immunity genes in the pathogenesis of systemic lupus erythematosus         | N | Bentham et al. <sup>26</sup>      |
| NG   | A genome-wide association study confirms <i>PNPLA3</i> and identifies <i>TM6SF2</i> and <i>MBOAT7</i> as risk loci for alcohol-related cirrhosis             | N | Buch et al. <sup>27</sup>         |
| NG   | Genetic fine mapping and genomic annotation defines causal mechanisms at type 2 diabetes susceptibility loci                                                 | N | Gaulton et al. <sup>28</sup>      |
| NG   | A large genome-wide association study of age-related macular degeneration highlights contributions of rare and common variants                               | N | Fritsche et al. <sup>29</sup>     |
| NAR  | Substantial DNA methylation differences between two major neuronal subtypes in human brain                                                                   | N | Kozlenkov et al. <sup>30</sup>    |
| NAR  | Discover hidden splicing variations by mapping personal transcriptomes to personal genomes                                                                   | N | Stein et al. <sup>31</sup>        |
| AJHG | Genome-wide Comparative Analysis of Atopic Dermatitis and Psoriasis Gives Insight into Opposing Genetic Mechanisms                                           | N | Baurecht et al. <sup>32</sup>     |
| AJHG | UBE2L3 Polymorphism Amplifies NF- $\kappa$ B Activation and Promotes Plasma Cell Development, Linking Linear Ubiquitination to Multiple Autoimmune Diseases  | N | Lewis et al. <sup>33</sup>        |
| AJHG | Identification of Functional Variants for Cleft Lip with or without Cleft Palate in or near PAX7, FGFR2, and NOG by Targeted Sequencing of GWAS Loci         | Y | Leslie et al. <sup>34</sup>       |
| AJHG | Meta-analysis of 65,734 Individuals Identifies TSPAN15 and SLC44A2 as Two Susceptibility Loci for Venous Thromboembolism                                     | Y | Germain et al. <sup>35</sup>      |
| AJHG | Functional Loss of Semaphorin 3C and/or Semaphorin 3D and Their Epistatic Interaction with Ret Are Critical to Hirschsprung Disease Liability                | N | Jiang et al. <sup>36</sup>        |
| AJHG | Genome-wide Analysis of Body Proportion Classifies Height-Associated Variants by Mechanism of Action and Implicates Genes Important for Skeletal Development | N | Chan et al. <sup>37</sup>         |
| AJHG | Lupus Risk Variant Increases pSTAT1 Binding and Decreases ETS1 Expression                                                                                    | N | Lu et al. <sup>38</sup>           |
| AJHG | A Functional SNP in BNC2 Is Associated with Adolescent Idiopathic Scoliosis                                                                                  | N | Ogura et al. <sup>39</sup>        |
| AJHG | Polymorphisms in a Putative Enhancer at the 10q21.2 Breast Cancer Risk Locus Regulate NRBF2 Expression                                                       | Y | Darabi et al. <sup>40</sup>       |

|      |                                                                                                                                                         |   |                              |
|------|---------------------------------------------------------------------------------------------------------------------------------------------------------|---|------------------------------|
| AJHG | Long-Range Modulation of PAG1 Expression by 8q21 Allergy Risk Variants                                                                                  | Y | Vicente et al. <sup>41</sup> |
| AJHG | Amino Acid Variation in HLA Class II Proteins Is a Major Determinant of Humoral Response to Common Viruses                                              | N | Hammer et al. <sup>42</sup>  |
| AJHG | Multiple Hepatic Regulatory Variants Multiple Hepatic Regulatory Variants with High-Density Lipoprotein Cholesterol at the GALNT2 GWAS Locus Associated | N | Roman et al. <sup>43</sup>   |
| AJHG | Genome-wide Association Analysis of Psoriatic Arthritis and Cutaneous Psoriasis Reveals Differences in Their Genetic Architecture                       | Y | Stuart et al. <sup>44</sup>  |

16/44

1. Hibar, D. P. *et al.* Common genetic variants influence human subcortical brain structures. *Nature* **520**, 224–229 (2015).
2. Shungin, D. *et al.* New genetic loci link adipose and insulin biology to body fat distribution. *Nature* **518**, 187–196 (2015).
3. Locke, A. E. *et al.* Genetic studies of body mass index yield new insights for obesity biology. *Nature* **518**, 197–206 (2015).
4. CONVERGE consortium. Sparse whole-genome sequencing identifies two loci for major depressive disorder. *Nature* **523**, 588–591 (2015).
5. Zheng, H. F. *et al.* Whole-genome sequencing identifies EN1 as a determinant of bone density and fracture. *Nature* **526**, 112–117 (2015).
6. Malaria Genomic Epidemiology Network *et al.* A novel locus of resistance to severe malaria in a region of ancient balancing selection. *Nature* **526**, 253–257 (2015).
7. Oldridge, D. A. *et al.* Genetic predisposition to neuroblastoma mediated by a LMO1 super-enhancer polymorphism. *Nature* **528**, 418–421 (2015).
8. Barson, N. J. *et al.* Sex-dependent dominance at a single locus maintains variation in age at maturity in salmon. *Nature* **528**, 405–408 (2015).
9. Kuchenbaecker, K. B. *et al.* Identification of six new susceptibility loci for invasive epithelial ovarian cancer. *Nat. Genet.* **47**, 164–171 (2015).
10. Liu, H. *et al.* Discovery of six new susceptibility loci and analysis of pleiotropic effects in leprosy. *Nat. Genet.* **47**, 267–271 (2015).
11. Xu, H. *et al.* Common variants in ACYP2 influence susceptibility to cisplatin-induced hearing loss. *Nat. Genet.* **47**, 263–266 (2015).
12. Aung, T. *et al.* A common variant mapping to CACNA1A is associated with susceptibility to exfoliation syndrome. *Nat. Genet.* **47**, 387–392 (2015).
13. Michailidou, K. *et al.* Genome-wide association analysis of more than 120,000 individuals identifies 15 new susceptibility loci for breast cancer. *Nat. Genet.* **47**, 373–380 (2015).
14. Curtis, J. *et al.* Susceptibility to tuberculosis is associated with variants in the ASAP1 gene encoding a regulator of dendritic cell migration. *Nat. Genet.* **47**, 523–527 (2015).
15. Ye, Z. *et al.* Common variants at 10p12.31, 10q21.1 and 13q12.13 are associated with sporadic pituitary adenoma. *Nat. Genet.* **47**, 793–797 (2015).

16. Kelemen, L. E. *et al.* Genome-wide significant risk associations for mucinous ovarian carcinoma. *Nat. Genet.* **47**, 888–897 (2015).
17. Helgason, H. *et al.* Loss-of-function variants in ATM confer risk of gastric cancer. *Nat. Genet.* **47**, 906–910 (2015).
18. Childs, E. J. *et al.* Common variation at 2p13.3, 3q29, 7p13 and 17q25.1 associated with susceptibility to pancreatic cancer. *Nat. Genet.* **47**, 911–916 (2015).
19. Liu, J. Z. *et al.* Association analyses identify 38 susceptibility loci for inflammatory bowel disease and highlight shared genetic risk across populations. *Nat. Genet.* **47**, 979–986 (2015).
20. Grünewald, T. G. P. *et al.* Chimeric EWSR1-FLI1 regulates the Ewing sarcoma susceptibility gene EGR2 via a GGAA microsatellite. *Nat. Genet.* **47**, 1073–1078 (2015).
21. Law, M. H. *et al.* Genome-wide meta-analysis identifies five new susceptibility loci for cutaneous malignant melanoma. *Nat. Genet.* **47**, 987–995 (2015).
22. Aminkeng, F. *et al.* A coding variant in RARG confers susceptibility to anthracycline-induced cardiotoxicity in childhood cancer. *Nat. Genet.* **47**, 1079–1084 (2015).
23. Zoledziewska, M. *et al.* Height-reducing variants and selection for short stature in Sardinia. *Nat. Genet.* **47**, 1352–1356 (2015).
24. Sidore, C. *et al.* Genome sequencing elucidates Sardinian genetic architecture and augments association analyses for lipid and blood inflammatory markers. *Nat. Genet.* **47**, 1272–1281 (2015).
25. Kato, N. *et al.* Trans-ancestry genome-wide association study identifies 12 genetic loci influencing blood pressure and implicates a role for DNA methylation. *Nat. Genet.* **47**, 1282–1293 (2015).
26. Bentham, J. *et al.* Genetic association analyses implicate aberrant regulation of innate and adaptive immunity genes in the pathogenesis of systemic lupus erythematosus. *Nat. Genet.* **47**, 1457–1464 (2015).
27. Buch, S. *et al.* A genome-wide association study confirms PNPLA3 and identifies TM6SF2 and MBOAT7 as risk loci for alcohol-related cirrhosis. *Nat. Genet.* **47**, 1443–1448 (2015).
28. Gaulton, K. J. *et al.* Genetic fine mapping and genomic annotation defines causal mechanisms at type 2 diabetes susceptibility loci. *Nat. Genet.* **47**, 1415–1425 (2015).
29. Fritsche, L. G. *et al.* A large genome-wide association study of age-related macular degeneration highlights contributions of rare and common variants. *Nat. Genet.* **48**, 134–143 (2016).
30. Kozlenkov, A. *et al.* Substantial DNA methylation differences between two major neuronal subtypes in human brain. *Nucleic Acids Res.* **44**, 2593–2612 (2016).
31. Stein, S., Lu, Z.-X., Bahrami-Samani, E., Park, J. W. & Xing, Y. Discover hidden splicing variations by mapping personal transcriptomes to personal genomes. *Nucleic Acids Res.* **43**, 10612–10622 (2015).
32. Baurecht, H. *et al.* Genome-wide comparative analysis of atopic dermatitis and psoriasis gives insight into opposing genetic mechanisms. *Am. J. Hum. Genet.*

- 96**, 104–120 (2015).
33. Lewis, M. J. *et al.* UBE2L3 polymorphism amplifies NF- $\kappa$ B activation and promotes plasma cell development, linking linear ubiquitination to multiple autoimmune diseases. *Am. J. Hum. Genet.* **96**, 221–234 (2015).
  34. Leslie, E. J. *et al.* Identification of functional variants for cleft lip with or without cleft palate in or near PAX7, FGFR2, and NOG by targeted sequencing of GWAS loci. *Am. J. Hum. Genet.* **96**, 397–411 (2015).
  35. Germain, M. *et al.* Meta-analysis of 65,734 individuals identifies TSPAN15 and SLC44A2 as two susceptibility loci for venous thromboembolism. *Am. J. Hum. Genet.* **96**, 532–542 (2015).
  36. Jiang, Q. *et al.* Functional loss of semaphorin 3C and/or semaphorin 3D and their epistatic interaction with ret are critical to Hirschsprung disease liability. *Am. J. Hum. Genet.* **96**, 581–596 (2015).
  37. Chan, Y. *et al.* Genome-wide Analysis of Body Proportion Classifies Height-Associated Variants by Mechanism of Action and Implicates Genes Important for Skeletal Development. *Am. J. Hum. Genet.* **96**, 695–708 (2015).
  38. Lu, X. *et al.* Lupus Risk Variant Increases pSTAT1 Binding and Decreases ETS1 Expression. *Am. J. Hum. Genet.* **96**, 731–739 (2015).
  39. Ogura, Y. *et al.* A Functional SNP in BNC2 Is Associated with Adolescent Idiopathic Scoliosis. *Am. J. Hum. Genet.* **97**, 337–342 (2015).
  40. Darabi, H. *et al.* Polymorphisms in a Putative Enhancer at the 10q21.2 Breast Cancer Risk Locus Regulate NRBF2 Expression. *Am. J. Hum. Genet.* **97**, 22–34 (2015).
  41. Vicente, C. T. *et al.* Long-Range Modulation of PAG1 Expression by 8q21 Allergy Risk Variants. *Am. J. Hum. Genet.* **97**, 329–336 (2015).
  42. Hammer, C. *et al.* Amino Acid Variation in HLA Class II Proteins Is a Major Determinant of Humoral Response to Common Viruses. *Am. J. Hum. Genet.* **97**, 738–743 (2015).
  43. Roman, T. S. *et al.* Multiple Hepatic Regulatory Variants at the GALNT2 GWAS Locus Associated with High-Density Lipoprotein Cholesterol. *Am. J. Hum. Genet.* **97**, 801–815 (2015).
  44. Stuart, P. E. *et al.* Genome-wide Association Analysis of Psoriatic Arthritis and Cutaneous Psoriasis Reveals Differences in Their Genetic Architecture. *Am. J. Hum. Genet.* **97**, 816–836 (2015).
