# Supplementary material
Source: PubMed Central journal article supplement (PMC5553318)
Supplement: NIHMS884250-supplement-Supplement_2.pdf [file NIHMS884250-supplement-Supplement_2.pdf]

| Locus                | wt | Variant | Effect Size | RegulomeDB     | CADD           | FATHMM-MKL     | DeepSea        |
|----------------------|----|---------|-------------|----------------|----------------|----------------|----------------|
| chr2:169939183       | A  | C       | 0.7         | 6              | -0.121046      | 0.16411        | 0.12129        |
| chr2:169939190       | G  | A       | -0.32       | 7              | 0.015896       | 0.21723        | 0.15632        |
| chr2:169939195       | A  | T       | 0           | 7              | -0.224612      | 0.10169        | 0.41914        |
| chr2:169939285       | A  | T       | 0           | 7              | 0.282212       | 0.18601        | 0.14543        |
| chr2:169939306       | C  | G       | -0.49       | 6              | 0.615067       | 0.1716         | 0.16526        |
| chr2:169939326       | G  | C       | 0.55        | 6              | -0.139335      | 0.09156        | 0.075831       |
| chr2:169939384       | C  | A       | 0           | 7              | 0.053743       | 0.07753        | 0.27882        |
| chr2:169939406       | G  | A       | -0.29       | 6              | 0.156191       | 0.06375        | 0.19377        |
| chr2:169939439       | T  | G       | 0.24        | 6              | 0.547697       | 0.0709         | 0.19076        |
| chr2:169939481       | T  | A       | 0           | 7              | 0.323825       | 0.05077        | 0.20446        |
| chr2:169939488       | A  | T       | 0.27        | 6              | -0.152648      | 0.09396        | 0.18154        |
| chr2:169939518       | T  | C       | -0.26       | 6              | 0.078132       | 0.11616        | 0.17217        |
| chr2:169939590       | A  | G       | 0           | 4              | 0.18177        | 0.10276        | 0.10276        |
| chr2:169939606       | T  | C       | 1.55        | 4              | 0.380005       | 0.15802        | 0.025428       |
| chr2:169939631       | A  | T       | -0.87       | 4              | 0.81341        | 0.23756        | 0.0070309      |
| chr9:104195574       | C  | G       | 0           | 5              | 0.123536       | 0.28625        | 0.067715       |
| chr9:104195601       | A  | T       | -0.4        | 4              | -0.119215      | 0.93267        | 0.048447       |
| chr9:104195619       | A  | G       | 0.47        | 3a             | 0.147303       | 0.91514        | 0.0067969      |
| chr9:104195620       | T  | G       | 0           | 3a             | 0.063471       | 0.37886        | 0.023668       |
| chr9:104195666       | T  | C       | 1.26        | 2b             | 1.131859       | 0.95872        | 0.0023536      |
| chr9:104195668       | A  | G       | -1.46       | 2b             | 1.177299       | 0.96107        | 0.0044261      |
| chr9:104195670       | G  | C       | -1.58       | 2b             | 1.039256       | 0.96519        | 0.0025208      |
| chr9:104195689       | C  | G       | 0.02        | 2b             | 0.206058       | 0.92497        | 0.054673       |
| chr9:104195693       | T  | G       | 1.6         | 4              | 0.024412       | 0.31572        | 0.023061       |
| chr9:104195729       | G  | T       | 1.02        | 2a             | 2.169323       | 0.93403        | 0.0029248      |
| chr9:104195758       | A  | C       | 0           | 4              | -0.068646      | 0.22992        | 0.018176       |
| chr9:104195760       | A  | C       | -1.29       | 4              | -0.385324      | 0.36103        | 0.020225       |
| chr9:104195771       | G  | A       | 1.13        | 4              | 0.160706       | 0.35646        | 0.001578       |
| chr9:104195788       | A  | G       | 0           | 4              | 0.179631       | 0.37461        | 0.044465       |
| chr9:104195790       | T  | G       | -0.65       | 4              | 0.259844       | 0.334          | 0.040097       |
| <b>R<sup>2</sup></b> |    |         |             | <b>0.26207</b> | <b>0.18736</b> | <b>0.16833</b> | <b>0.30727</b> |
